# Supplementary material
Source: Springer Nature journal article supplement (https://www.springermedizin.de/resource/supplementary/12885_2013_4492_MOESM3_ESM.pdf/9466502)

**a**HMVEC-LLy (+)  
HMVEC-LLy (-)

CCL21/SLC (+)

CCL21/SLC (-)

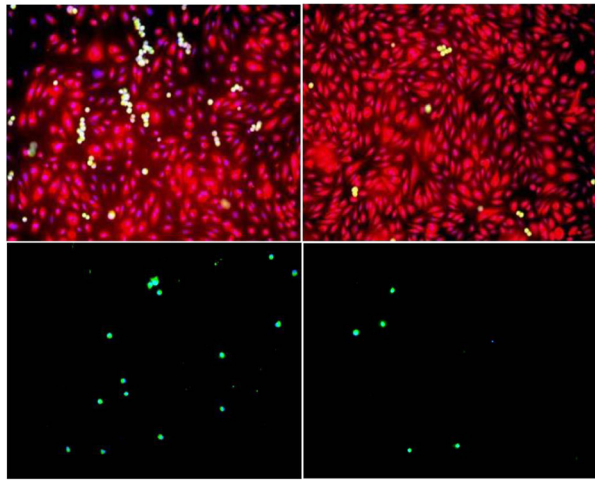**b**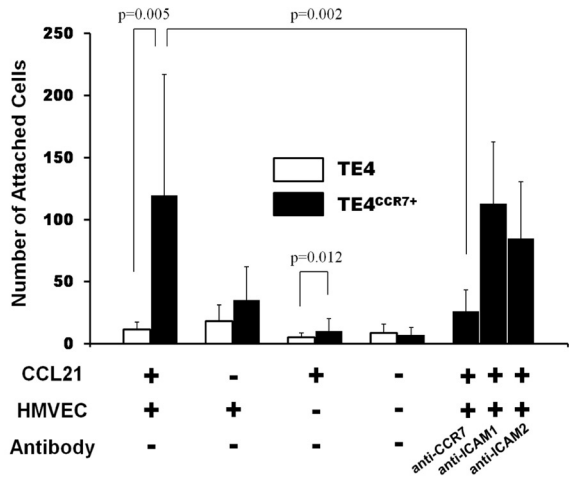

Supplement: MOESM3 [file 9466502]
